# Supplementary material for: Chelating-agent-assisted control of CsPbBr3 quantum well growth enables stable blue perovskite emitters
Source: PubMed Central journal article supplement (PMC7376073; doi:10.1038/s41467-020-17482-0), 2020-07-22
Supplement: 41467_2020_17482_MOESM1_ESM.pdf [file 41467_2020_17482_MOESM1_ESM.pdf]

*Supplementary Information for*

**Chelating-agent-assisted control of CsPbBr<sub>3</sub> quantum well growth enables stable blue perovskite emitters**

Ya-Kun Wang *et al.*

## Supplementary Figures

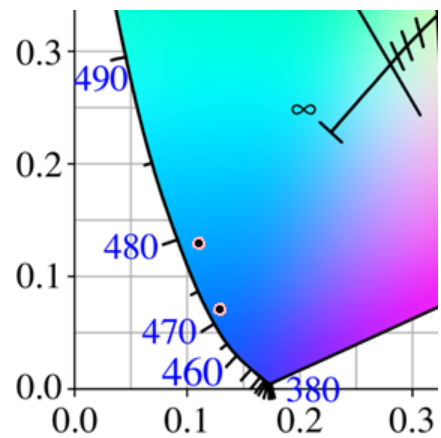

**Supplementary Figure 1.** CIE coordinate of  $\langle n \rangle = 2$  and 3 CsPbBr<sub>3</sub> thin-films with GABA-treatment.

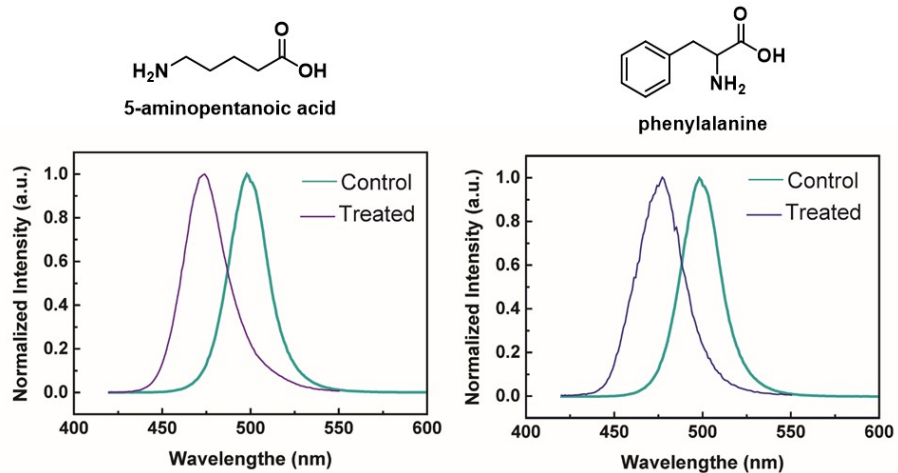

**Supplementary Figure 2.** PL spectra of control films other amino-acid-treated films.

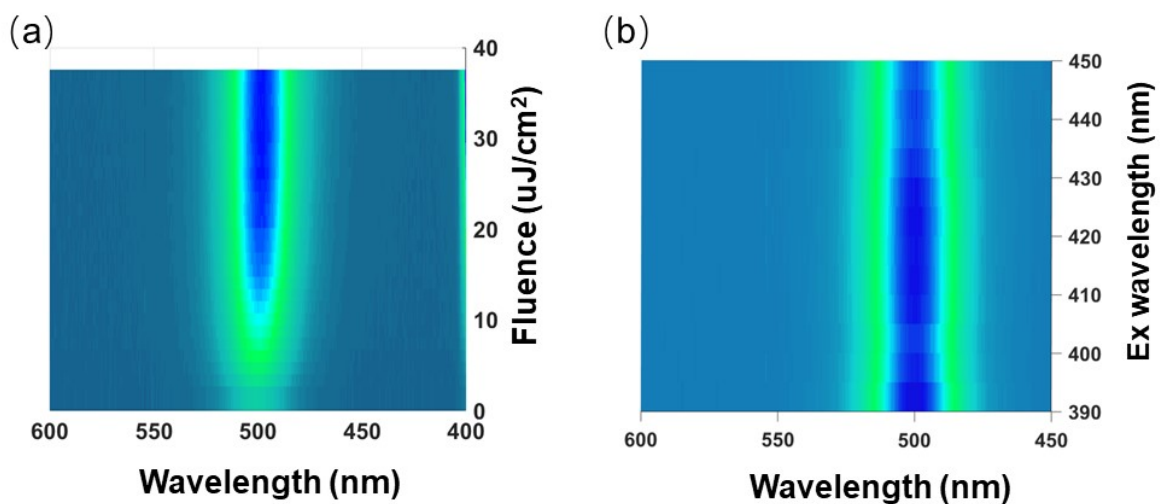

**Supplementary Figure 3.** (a) Power-dependent photoluminescence spectra and (b) excitation wavelength dependent photoluminescence spectra of control CsPbBr<sub>3</sub> thin-films.

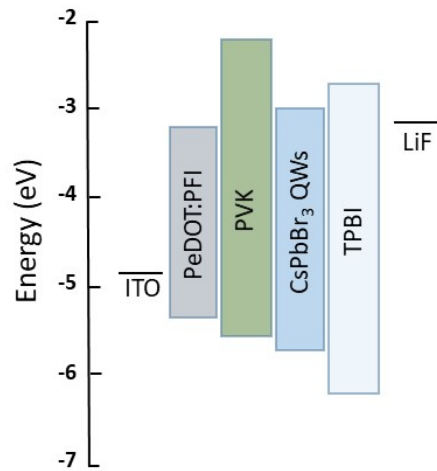

**Supplementary Figure 4.** Energy level of LEDs fabricated using perovskite QWs.

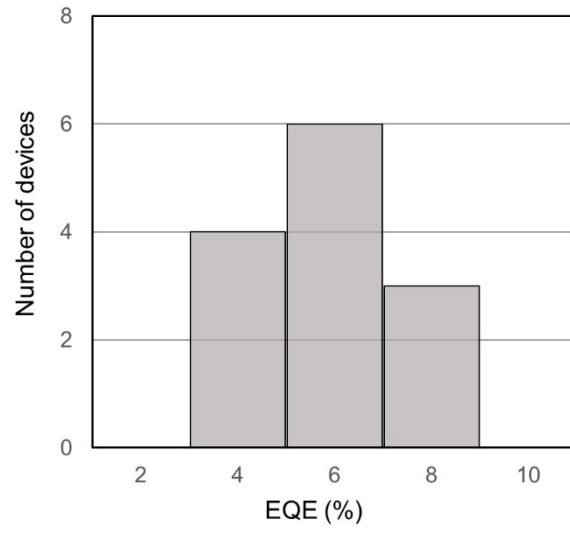

**Supplementary Figure 5.** EQE histograms of blue LED with GABA-treatment.

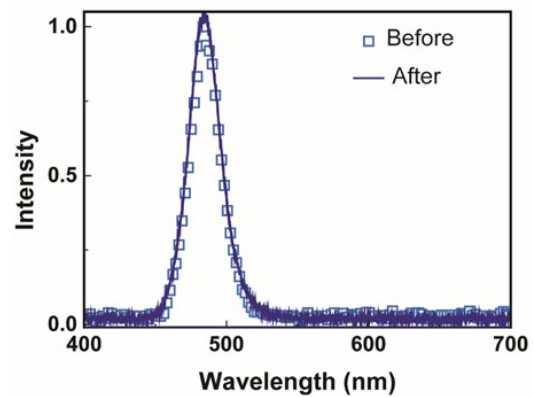

**Supplementary Figure 6.** EL spectra of GABA-treated CsPbBr<sub>3</sub> device before and after stability measurement.
